# Supplementary material
Source: HighWire-hosted journal article supplement (https://www.jpn.ca/highwire/filestream/89533/field_highwire_adjunct_files/0/jpn-150371-1-at.pdf)
Supplement: jpn-150371-1-at.pdf [file jpn-150371-1-at.pdf]

**Appendix 1** to Mous SE, White T, Muetzel RL, et al. Cortical morphology as a shared neurobiological substrate of attention-deficit/hyperactivity symptoms and executive functioning: a population-based pediatric neuroimaging study. *J Psychiatry Neurosci* 2016.

DOI: 10.1503/jpn.150371

Copyright © 2016 The Author(s) or their employer(s). To receive this resource in an accessible format, please contact us at [cmajgroup@cmaj.ca](mailto:cmajgroup@cmaj.ca).

*Online appendices are unedited and posted as supplied by the authors.*

**Table S1.** Spearman correlations NEPSY-II-NL subtestscores and corresponding domainscore ( $n=1,307$ )

|                                     | Overall score | Attention and Executive Functioning domain score | Language domain score | Memory and Learning domain score | Sensorimotor Functioning domain score I: speed accuracy interaction | Sensorimotor Functioning domain score II: pencillifts | Visuospatial Processing domain score |
|-------------------------------------|---------------|--------------------------------------------------|-----------------------|----------------------------------|---------------------------------------------------------------------|-------------------------------------------------------|--------------------------------------|
| Auditory Attention                  |               |                                                  |                       |                                  |                                                                     |                                                       |                                      |
| Total score                         | 0.56*         | 0.61*                                            | n/a                   | n/a                              | n/a                                                                 | n/a                                                   | n/a                                  |
| Commission errors                   | -0.41*        | -0.42*                                           | n/a                   | n/a                              | n/a                                                                 | n/a                                                   | n/a                                  |
| Omission errors                     | -0.56*        | -0.61*                                           | n/a                   | n/a                              | n/a                                                                 | n/a                                                   | n/a                                  |
| Inhibition errors                   | -0.26*        | -0.29*                                           | n/a                   | n/a                              | n/a                                                                 | n/a                                                   | n/a                                  |
| Response Set                        |               |                                                  |                       |                                  |                                                                     |                                                       |                                      |
| Total score                         | 0.70*         | 0.80*                                            | n/a                   | n/a                              | n/a                                                                 | n/a                                                   | n/a                                  |
| Commission errors                   | -0.59*        | -0.68*                                           | n/a                   | n/a                              | n/a                                                                 | n/a                                                   | n/a                                  |
| Omission errors                     | -0.70*        | -0.80*                                           | n/a                   | n/a                              | n/a                                                                 | n/a                                                   | n/a                                  |
| Inhibition errors                   | -0.49*        | -0.53*                                           | n/a                   | n/a                              | n/a                                                                 | n/a                                                   | n/a                                  |
| Statue                              |               |                                                  |                       |                                  |                                                                     |                                                       |                                      |
| Total score                         | 0.33*         | 0.48*                                            | n/a                   | n/a                              | n/a                                                                 | n/a                                                   | n/a                                  |
| Total movements                     | -0.30*        | -0.42*                                           | n/a                   | n/a                              | n/a                                                                 | n/a                                                   | n/a                                  |
| Total sounds                        | -0.18*        | -0.32*                                           | n/a                   | n/a                              | n/a                                                                 | n/a                                                   | n/a                                  |
| Total eye openings                  | -0.28*        | -0.41*                                           | n/a                   | n/a                              | n/a                                                                 | n/a                                                   | n/a                                  |
| Word Generation                     |               |                                                  |                       |                                  |                                                                     |                                                       |                                      |
| Total of correct words Animals      | 0.55*         | n/a                                              | 0.85*                 | n/a                              | n/a                                                                 | n/a                                                   | n/a                                  |
| Total of correct words Foods/Drinks | 0.54*         | n/a                                              | 0.87*                 | n/a                              | n/a                                                                 | n/a                                                   | n/a                                  |
| Memory for Faces                    |               |                                                  |                       |                                  |                                                                     |                                                       |                                      |

**Appendix 1** to Mous SE, White T, Muetzel RL, et al. Cortical morphology as a shared neurobiological substrate of attention-deficit/hyperactivity symptoms and executive functioning: a population-based pediatric neuroimaging study. *J Psychiatry Neurosci* 2016.

DOI: 10.1503/jpn.150371

*Online appendices are unedited and posted as supplied by the authors.*

|                                          |        |       |       |       |        |        |       |
|------------------------------------------|--------|-------|-------|-------|--------|--------|-------|
| Total score                              | 0.34*  | n/a   | n/a   | 0.52* | n/a    | n/a    | n/a   |
| Memory for Faces – delayed               |        |       |       |       |        |        |       |
| Total score                              | 0.33*  | n/a   | n/a   | 0.50* | n/a    | n/a    | n/a   |
| Narrative Memory                         |        |       |       |       |        |        |       |
| Total score free and cued recall         | 0.62*  | n/a   | n/a   | 0.82* | n/a    | n/a    | n/a   |
| Total score free recall                  | 0.66*  | n/a   | n/a   | 0.84* | n/a    | n/a    | n/a   |
| Total score recognition                  | 0.41*  | n/a   | n/a   | 0.56* | n/a    | n/a    | n/a   |
| Visuomotor Precision                     |        |       |       |       |        |        |       |
| Total speed accuracy interaction score   | -0.53* | n/a   | n/a   | n/a   | -0.96* | n/a    | n/a   |
| Total pencil lifts                       | -0.04  | n/a   | n/a   | n/a   | n/a    | -0.99* | n/a   |
| Arrows                                   |        |       |       |       |        |        |       |
| Total score                              | 0.47*  | n/a   | n/a   | n/a   | n/a    | n/a    | 0.83* |
| Geometric Puzzles                        |        |       |       |       |        |        |       |
| Total score                              | 0.32*  | n/a   | n/a   | n/a   | n/a    | n/a    | 0.63* |
| Route Finding                            |        |       |       |       |        |        |       |
| Total score                              | 0.56*  | n/a   | n/a   | n/a   | n/a    | n/a    | 0.75* |
| % variance explained first component PCA | 25.15  | 35.41 | 78.61 | 50.90 | n/a    | n/a    | 58.86 |

*Note.* NEPSY = neuropsychological assessment. n/a = not applicable. \* $p < 0.01$

**Appendix 1** to Mous SE, White T, Muetzel RL, et al. Cortical morphology as a shared neurobiological substrate of attention-deficit/hyperactivity symptoms and executive functioning: a population-based pediatric neuroimaging study. *J Psychiatry Neurosci* 2016.

DOI: 10.1503/jpn.150371

Online appendices are unedited and posted as supplied by the authors.

**Table S2.** Association between CBCL ADHP score\* and NEPSY-II-NL overall- and domainscores

|                             | Overall score*                                                      |         |          | Attention and Executive Functioning domain score*      |         |          | Language domain score                 |         |          | Memory and Learning domain score |         |          |
|-----------------------------|---------------------------------------------------------------------|---------|----------|--------------------------------------------------------|---------|----------|---------------------------------------|---------|----------|----------------------------------|---------|----------|
|                             | B (95% CI)                                                          | $\beta$ | <i>p</i> | B (95% CI)                                             | $\beta$ | <i>p</i> | B (95% CI)                            | $\beta$ | <i>p</i> | B (95% CI)                       | $\beta$ | <i>p</i> |
| <i>Model I (unadjusted)</i> | -0.04 (-0.06;-0.02)                                                 | -0.12   | <0.001   | -0.06 (-0.08;-0.03)                                    | -0.15   | <0.001   | -0.04 (-0.12;0.05)                    | -0.03   | 0.44     | -0.00 (-0.09;0.08)               | -0.00   | 0.95     |
| <i>Model II (adjusted)</i>  | -0.02 (-0.04;0.01)                                                  | -0.05   | 0.18     | -0.04 (-0.07;-0.02)                                    | -0.12   | 0.002    | 0.05 (-0.04;0.14)                     | 0.04    | 0.29     | 0.06 (-0.03;0.15)                | 0.05    | 0.17     |
| <i>Model II+IQ</i>          | -0.01 (-0.03;0.01)                                                  | -0.03   | 0.44     | -0.04 (-0.07;-0.01)                                    | -0.11   | 0.004    | 0.06 (-0.03;0.15)                     | 0.05    | 0.19     | 0.08 (-0.01;0.17)                | 0.07    | 0.07     |
|                             | Sensorimotor Functioning domain score I: speed accuracy interaction |         |          | Sensorimotor Functioning domain score II: pencil lifts |         |          | Visuospatial Processing domain score* |         |          |                                  |         |          |
|                             | B (95% CI)                                                          | $\beta$ | <i>p</i> | B (95% CI)                                             | $\beta$ | <i>p</i> | B (95% CI)                            | $\beta$ | <i>p</i> |                                  |         |          |
| <i>Model I (unadjusted)</i> | -0.03 (-0.05;-0.01)                                                 | -0.09   | 0.01     | -0.03 (-0.06;0.01)                                     | -0.05   | 0.13     | -0.02 (-0.04;0.01)                    | -0.05   | 0.19     |                                  |         |          |
| <i>Model II (adjusted)</i>  | -0.02 (-0.04;0.01)                                                  | -0.05   | 0.15     | -0.03 (-0.06;0.01)                                     | -0.06   | 0.12     | 0.00 (-0.02;0.03)                     | 0.01    | 0.84     |                                  |         |          |
| <i>Model II + IQ</i>        | -0.01 (-0.04;0.01)                                                  | -0.05   | 0.22     | -0.03 (-0.07;0.01)                                     | -0.06   | 0.09     | 0.02 (-0.01;0.04)                     | 0.04    | 0.22     |                                  |         |          |

Note. CBCL = Child Behavior Checklist; ADHP = attention-deficit/hyperactivity problems; NEPSY = neuropsychological assessment. Both determinant (CBCL) and outcome (NEPSY) were residualized for age during assessment in all models. Model I is unadjusted. Model II was adjusted for child gender, ethnicity, gestational age at birth, birth weight, psychostimulant use, maternal education, drinking during pregnancy, smoking during pregnancy and household income. The B's are not interpretable since square root transformed scores (\*) were used in the analyses. A higher CBCL ADHP score indicates more attention and hyperactivity problems, a higher NEPSY score indicates better functioning.

**Appendix 1** to Mous SE, White T, Muetzel RL, et al. Cortical morphology as a shared neurobiological substrate of attention-deficit/hyperactivity symptoms and executive functioning: a population-based pediatric neuroimaging study. *J Psychiatry Neurosci* 2016.

DOI: 10.1503/jpn.150371

Online appendices are unedited and posted as supplied by the authors.

**Table S3.** Vertex-wise analyses of CBCL ADHP score and NEPSY-II-NL ATT/EF score with cortical morphology

|                                                    | Cluster size (mm <sup>2</sup> ) | Talairach coordinates |       |      | No. of vertices within cluster | Clusterwise (corrected) <i>p</i> -value |
|----------------------------------------------------|---------------------------------|-----------------------|-------|------|--------------------------------|-----------------------------------------|
|                                                    |                                 | TalX                  | TalY  | TalZ |                                |                                         |
| <b>CBCL ADHP &amp; cortical thickness</b>          |                                 |                       |       |      |                                |                                         |
| <b>Left Hemisphere</b>                             |                                 |                       |       |      |                                |                                         |
| Caudal middlefrontal                               | 1049.32                         | -34.1                 | 6.8   | 20.0 | 2039                           | 0.009                                   |
| <b>Right Hemisphere</b>                            |                                 |                       |       |      |                                |                                         |
| Postcentral                                        | 6397.91                         | 49.3                  | -13.2 | 47.9 | 15175                          | <0.001                                  |
| Lateral occipital                                  | 1940.74                         | 26.4                  | -91.9 | 13.1 | 2766                           | <0.001                                  |
| Superior temporal                                  | 1470.95                         | 48.1                  | -16.0 | -7.8 | 3118                           | <0.001                                  |
| Cuneus                                             | 1677.35                         | 11.5                  | -69.9 | 23.1 | 2529                           | <0.001                                  |
| <b>NEPSY-II-NL ATT/EF &amp; cortical thickness</b> |                                 |                       |       |      |                                |                                         |
| <b>Left Hemisphere</b>                             |                                 |                       |       |      |                                |                                         |
| none                                               | N/A                             | N/A                   | N/A   | N/A  | N/A                            | N/A                                     |
| <b>Right Hemisphere</b>                            |                                 |                       |       |      |                                |                                         |
| none                                               | N/A                             | N/A                   | N/A   | N/A  | N/A                            | N/A                                     |
| <b>CBCL ADHP &amp; gyrification</b>                |                                 |                       |       |      |                                |                                         |
| <b>Left Hemisphere</b>                             |                                 |                       |       |      |                                |                                         |
| Frontal/temporal/parietal (LH1)                    | 37822.11                        | -4.9                  | -62.3 | 26.6 | 74434                          | <0.001                                  |
| Superior parietal/postcentral (LH2)                | 3903.37                         | -35.0                 | -29.7 | 61.0 | 9520                           | <0.001                                  |
| <b>Right Hemisphere</b>                            |                                 |                       |       |      |                                |                                         |
| Frontal/temporal/parietal (RH1)                    | 36480.54                        | 20.8                  | 24.5  | 49.5 | 74882                          | <0.001                                  |
| <b>NEPSY-II-NL ATT/EF &amp; gyrification</b>       |                                 |                       |       |      |                                |                                         |
| <b>Left Hemisphere</b>                             |                                 |                       |       |      |                                |                                         |
| Inferior parietal (LH3)                            | 4359.38                         | -39.8                 | -77.9 | 19.2 | 8686                           | <0.001                                  |
| Frontal (LH4)                                      | 1933.25                         | -21.6                 | 52.9  | 2.2  | 2880                           | 0.04                                    |
| <b>Right Hemisphere</b>                            |                                 |                       |       |      |                                |                                         |
| Frontal/parietal (RH2)                             | 12178.87                        | 22.8                  | -4.6  | 44.1 | 26051                          | <0.001                                  |
| Frontal/temporal (RH3)                             | 6222.21                         | 44.2                  | 35.6  | -1.1 | 14233                          | <0.001                                  |
| Occipital (RH4)                                    | 2489.04                         | 31.6                  | -77.6 | -4.1 | 3333                           | 0.01                                    |

Note. CBCL = Child Behavior Checklist; ADHP = attention-deficit/hyperactivity problems; NEPSY = neuropsychological assessment; ATT/EF = Attention and Executive Functioning. The CBCL and NEPSY scores were square root transformed. Analyses corrected for gender, age during scanning used as nuisance factor. Monte Carlo Simulation ( $p < 0.05$ ) was applied to correct for multiple testing. TalX = Talairach region X plane; TalY = Talairach region Y plane; TalZ = Talairach region Z plane.

**Appendix 1** to Mous SE, White T, Muetzel RL, et al. Cortical morphology as a shared neurobiological substrate of attention-deficit/hyperactivity symptoms and executive functioning: a population-based pediatric neuroimaging study. *J Psychiatry Neurosci* 2016.

DOI: 10.1503/jpn.150371

*Online appendices are unedited and posted as supplied by the authors.*

**Table S4.** Gender stratified cluster-wise regression analyses of the association between CBCL ADHP score, NEPSY-II-NL ATT/EF score and cortical thickness

| Cluster                 | DETECTION BOYS (n=407)                  |         |          | DETECTION GIRLS (n=369)                 |         |          |
|-------------------------|-----------------------------------------|---------|----------|-----------------------------------------|---------|----------|
|                         | CBCL ADHP & cortical thickness          |         |          | CBCL ADHP & cortical thickness          |         |          |
|                         | B (95% CI)                              | $\beta$ | <i>p</i> | B (95% CI)                              | $\beta$ | <i>p</i> |
| <b>Left Hemisphere</b>  |                                         |         |          |                                         |         |          |
| Caudal middle frontal   | -0.04 (-0.07;-0.01)                     | -0.13   | 0.013    | -0.04 (-0.07;-0.01)                     | -0.15   | 0.006    |
| <b>Right Hemisphere</b> |                                         |         |          |                                         |         |          |
| Postcentral             | -0.05 (-0.08;-0.03)                     | -0.25   | <0.001   | -0.04 (-0.07;-0.02)                     | -0.20   | <0.001   |
| Lateral occipital       | -0.06 (-0.09;-0.03)                     | -0.20   | <0.001   | -0.05 (-0.07;-0.02)                     | -0.17   | 0.001    |
| Superior temporal       | -0.05 (-0.09;-0.02)                     | -0.16   | 0.017    | -0.05 (-0.08;-0.02)                     | -0.16   | 0.002    |
| Cuneus                  | -0.04 (-0.07;-0.02)                     | -0.16   | 0.002    | -0.04 (-0.07;-0.01)                     | -0.16   | 0.003    |
| <hr/>                   |                                         |         |          |                                         |         |          |
| Cluster                 | NEPSY-II-NL ATT/EF & cortical thickness |         |          | NEPSY-II-NL ATT/EF & cortical thickness |         |          |
|                         | B (95% CI)                              | $\beta$ | <i>p</i> | B (95% CI)                              | $\beta$ | <i>p</i> |
| <b>Left Hemisphere</b>  |                                         |         |          |                                         |         |          |
| none found              | -                                       | -       | -        | -                                       | -       | -        |
| <b>Right Hemisphere</b> |                                         |         |          |                                         |         |          |
| none found              | -                                       | -       | -        | -                                       | -       | -        |

*Note.* CBCL = Child Behavior Checklist; ADHP = attention-deficit/hyperactivity problems; NEPSY = neuropsychological assessment; ATT/EF = Attention and Executive Functioning. The CBCL ADHP and NEPSY ATT/EF scores were square root transformed, therefore B's are not interpretable. Both determinant (CBCL/NEPSY) and outcome (thickness) were residualized for age during assessment/scanning. Analyses adjusted for child gender, ethnicity, gestational age at birth, birth weight, psychostimulant use, IQ, maternal education, drinking during pregnancy, smoking during pregnancy and household income. A higher CBCL ADHP score indicates more attention and hyperactivity symptoms, a higher NEPSY score indicates better functioning.

**Appendix 1** to Mous SE, White T, Muetzel RL, et al. Cortical morphology as a shared neurobiological substrate of attention-deficit/hyperactivity symptoms and executive functioning: a population-based pediatric neuroimaging study. *J Psychiatry Neurosci* 2016.

DOI: 10.1503/jpn.150371

*Online appendices are unedited and posted as supplied by the authors.*

**Table S5.** Gender stratified cluster-wise regression analyses of the association between CBCL ADHP score, NEPSY-II-NL ATT/EF score and gyrification

| Cluster                             | DETECTION BOYS (n=407)<br>CBCL ADHP & gyrification |         |          | DETECTION GIRLS (n=369)<br>CBCL ADHP & gyrification |         |          |
|-------------------------------------|----------------------------------------------------|---------|----------|-----------------------------------------------------|---------|----------|
|                                     | B (95% CI)                                         | $\beta$ | <i>p</i> | B (95% CI)                                          | $\beta$ | <i>p</i> |
| <b>Left Hemisphere</b>              |                                                    |         |          |                                                     |         |          |
| Frontal/temporal/parietal (LH1)     | -0.04 (-0.06;-0.01)                                | -0.15   | 0.006    | -0.03 (-0.06;-0.01)                                 | -0.14   | 0.010    |
| Superior parietal/postcentral (LH2) | -0.04 (-0.08;0.00)                                 | -0.11   | 0.057    | -0.04 (-0.07;-0.00)                                 | -0.12   | 0.034    |
| <b>Right Hemisphere</b>             |                                                    |         |          |                                                     |         |          |
| Frontal/temporal/parietal (RH1)     | -0.04 (-0.07;-0.01)                                | -0.14   | 0.015    | -0.03 (-0.06;-0.01)                                 | -0.13   | 0.019    |
| Cluster                             | NEPSY-II-NL ATT/EF & gyrification                  |         |          | CBCL ADHP & gyrification                            |         |          |
|                                     | B (95% CI)                                         | $\beta$ | <i>p</i> | B (95% CI)                                          | $\beta$ | <i>p</i> |
| <b>Left Hemisphere</b>              |                                                    |         |          |                                                     |         |          |
| Inferior parietal (LH3)             | 0.02 (-0.06;0.10)                                  | 0.03    | 0.546    | 0.12 (0.03;0.20)                                    | 0.14    | 0.007    |
| Frontal (LH4)                       | 0.02 (-0.03;0.08)                                  | 0.04    | 0.431    | 0.09 (0.03;0.15)                                    | 0.15    | 0.006    |
| <b>Right Hemisphere</b>             |                                                    |         |          |                                                     |         |          |
| Frontal/parietal (RH2)              | 0.08 (-0.01;0.17)                                  | 0.10    | 0.075    | 0.11 (0.03;0.19)                                    | 0.15    | 0.010    |
| Frontal/temporal (RH3)              | 0.02 (-0.13;0.17)                                  | 0.02    | 0.750    | 0.22 (0.07;0.36)                                    | 0.15    | 0.004    |
| Occipital (RH4)                     | -0.01 (-0.09;0.07)                                 | -0.01   | 0.812    | 0.16 (0.07;0.24)                                    | 0.20    | <0.001   |

*Note.* CBCL = Child Behavior Checklist; ADHP = attention-deficit/hyperactivity problems; NEPSY = neuropsychological assessment; ATT/EF = Attention and Executive Functioning. The CBCL ADHP and NEPSY ATT/EF scores were square root transformed, therefore B's are not interpretable. Both determinant (CBCL/NEPSY) and outcome (gyrification) were residualized for age during assessment/scanning. Analyses adjusted for child gender, ethnicity, gestational age at birth, birth weight, psychostimulant use, IQ, maternal education, drinking during pregnancy, smoking during pregnancy and household income. A higher CBCL ADHP score indicates more attention and hyperactivity symptoms, a higher NEPSY score indicates better functioning.

**Appendix 1** to Mous SE, White T, Muetzel RL, et al. Cortical morphology as a shared neurobiological substrate of attention-deficit/hyperactivity symptoms and executive functioning: a population-based pediatric neuroimaging study. *J Psychiatry Neurosci* 2016.

DOI: 10.1503/jpn.150371

*Online appendices are unedited and posted as supplied by the authors.*

**Table S6.** Cluster-wise regression analyses of the association between CBCL ADHP score, NEPSY-II-NL ATT/EF score and cortical thickness, without children scoring above clinical CBCL cut-off (n=744)

| <b>DETECTION<br/>CBCL ADHP &amp; cortical thickness</b> |                     |                           |                 |
|---------------------------------------------------------|---------------------|---------------------------|-----------------|
| <b>Cluster</b>                                          | <b>B (95% CI)</b>   | <b><math>\beta</math></b> | <b><i>p</i></b> |
| <b>Left Hemisphere</b>                                  |                     |                           |                 |
| Caudal middle frontal                                   | -0.04 (-0.06;-0.02) | -0.13                     | <0.001          |
| <b>Right Hemisphere</b>                                 |                     |                           |                 |
| Postcentral                                             | -0.05 (-0.06;-0.03) | -0.20                     | <0.001          |
| Lateral occipital                                       | -0.05 (-0.07;-0.02) | -0.16                     | <0.001          |
| Superior temporal                                       | -0.05 (-0.08;-0.03) | -0.15                     | <0.001          |
| Cuneus                                                  | -0.05 (-0.07;-0.02) | -0.16                     | <0.001          |
| <b>NEPSY-II-NL ATT/EF &amp; cortical thickness</b>      |                     |                           |                 |
| <b>Cluster</b>                                          | <b>B (95% CI)</b>   | <b><math>\beta</math></b> | <b><i>p</i></b> |
| <b>Left Hemisphere</b>                                  |                     |                           |                 |
| none found                                              | -                   | -                         | -               |
| <b>Right Hemisphere</b>                                 |                     |                           |                 |
| none found                                              | -                   | -                         | -               |

*Note.* CBCL = Child Behavior Checklist; ADHP = attention-deficit/hyperactivity problems; NEPSY = neuropsychological assessment; ATT/EF = Attention and Executive Functioning. The CBCL ADHP and NEPSY ATT/EF scores were square root transformed, therefore B's are not interpretable. Both determinant (CBCL/NEPSY) and outcome (thickness) were residualized for age during assessment/scanning. Analyses adjusted for child gender, ethnicity, gestational age at birth, birth weight, psychostimulant use, IQ, maternal education, drinking during pregnancy, smoking during pregnancy and household income. A higher CBCL ADHP score indicates more attention and hyperactivity symptoms, a higher NEPSY score indicates better functioning.

**Appendix 1** to Mous SE, White T, Muetzel RL, et al. Cortical morphology as a shared neurobiological substrate of attention-deficit/hyperactivity symptoms and executive functioning: a population-based pediatric neuroimaging study. *J Psychiatry Neurosci* 2016.

DOI: 10.1503/jpn.150371

*Online appendices are unedited and posted as supplied by the authors.*

**Table S7.** Cluster-wise regression analyses of the association between CBCL ADHP score, NEPSY-II-NL ATT/EF score and gyrification, without children scoring above clinical CBCL cut-off (n=744)

| <b>DETECTION<br/>CBCL ADHP &amp; gyrification</b> |                     |                           |                 |
|---------------------------------------------------|---------------------|---------------------------|-----------------|
| <b>Cluster</b>                                    | <b>B (95% CI)</b>   | <b><math>\beta</math></b> | <b><i>p</i></b> |
| <b>Left Hemisphere</b>                            |                     |                           |                 |
| Frontal/temporal/parietal (LH1)                   | -0.04 (-0.06;-0.02) | -0.16                     | <0.001          |
| Superior parietal/postcentral (LH2)               | -0.04 (-0.06;-0.01) | -0.11                     | 0.007           |
| <b>Right Hemisphere</b>                           |                     |                           |                 |
| Frontal/temporal/parietal (RH1)                   | -0.04 (-0.06;-0.02) | -0.14                     | <0.001          |
| <b>NEPSY-II-NL ATT/EF &amp; gyrification</b>      |                     |                           |                 |
| <b>Cluster</b>                                    | <b>B (95% CI)</b>   | <b><math>\beta</math></b> | <b><i>p</i></b> |
| <b>Left Hemisphere</b>                            |                     |                           |                 |
| Inferior parietal (LH3)                           | 0.07 (0.01;0.13)    | 0.09                      | 0.021           |
| Frontal (LH4)                                     | 0.06 (0.02;0.11)    | 0.11                      | 0.005           |
| <b>Right Hemisphere</b>                           |                     |                           |                 |
| Frontal/parietal (RH2)                            | 0.11 (0.04;0.17)    | 0.13                      | 0.001           |
| Frontal/temporal (RH3)                            | 0.10 (-0.01;0.21)   | 0.07                      | 0.073           |
| Occipital (RH4)                                   | 0.07 (0.06;0.12)    | 0.08                      | 0.030           |

*Note.* CBCL = Child Behavior Checklist; ADHP = attention-deficit/hyperactivity problems; NEPSY = neuropsychological assessment; ATT/EF = Attention and Executive Functioning. The CBCL ADHP and NEPSY ATT/EF scores were square root transformed, therefore B's are not interpretable. Both determinant (CBCL/NEPSY) and outcome (gyrification) were residualized for age during assessment/scanning. Analyses adjusted for child gender, ethnicity, gestational age at birth, birth weight, psychostimulant use, IQ, maternal education, drinking during pregnancy, smoking during pregnancy and household income. A higher CBCL ADHP score indicates more attention and hyperactivity symptoms, a higher NEPSY score indicates better functioning.



**Appendix 1** to Mous SE, White T, Muetzel RL, et al. Cortical morphology as a shared neurobiological substrate of attention-deficit/hyperactivity symptoms and executive functioning: a population-based pediatric neuroimaging study. *J Psychiatry Neurosci* 2016.

DOI: 10.1503/jpn.150371

Online appendices are unedited and posted as supplied by the authors.

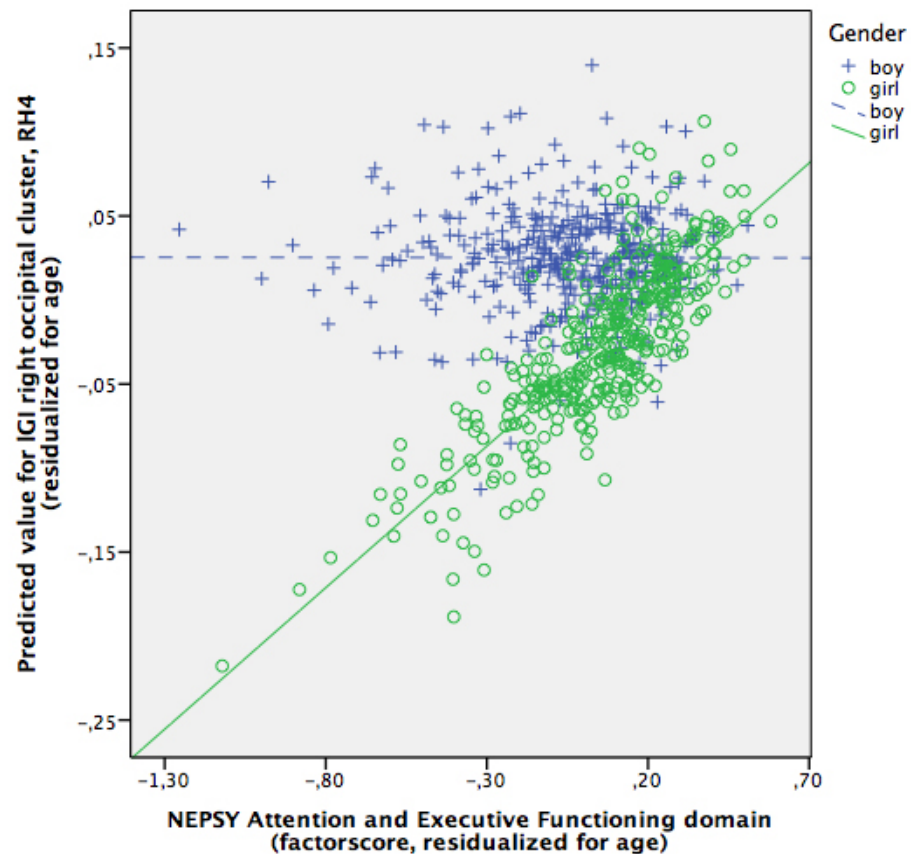

**Fig. S1:** Gender interaction effect association NEPSY Attention and EF score and right hemisphere occipital gyrification cluster (RHG).
